# Supplementary material for: A zeroth-order algorithm for distributed optimization with stochastic stripe observations
Source: Springer Nature journal article supplement (doi:10.1007/s11432-022-3637-y), 2023-04-14
Supplement: 11432_2022_3637_MOESM1_ESM.pdf [file 11432_2022_3637_MOESM1_ESM.pdf]

• Supplementary File •

# A zeroth-order Algorithm for distributed optimization with stochastic stripe observations

Yinghui WANG<sup>1</sup>, Xianlin ZENG<sup>2\*</sup>, Wenxiao ZHAO<sup>3</sup> & Yiguang HONG<sup>4</sup>

<sup>1</sup>*School of Automation and Electrical Engineering,  
University of Science and Technology Beijing, Beijing 100083, China.;*  
<sup>2</sup>*Key Laboratory of Intelligent Control and Decision of Complex Systems,  
School of Automation, Beijing Institute of Technology, 100081, Beijing, China;*  
<sup>3</sup>*Key Laboratory of Systems and Control, Academy of Mathematics and Systems Science  
Chinese Academy of Sciences, Beijing, China;*  
<sup>4</sup>*Tongji University*

## Appendix A Assumptions

Consider the following distributed optimization problem over an  $n$ -agent network [9]:

$$\begin{aligned} \min_{\mathbf{x}} \quad & f(\mathbf{x}), \quad f(\mathbf{x}) = \sum_{i=1}^n f_i(x_i) \\ \text{s. t.} \quad & x_i = x_j, x \in X \end{aligned} \tag{A1}$$

where  $\mathbf{x} = [x_1^\top, x_2^\top, \dots, x_n^\top]^\top \in \mathcal{R}^{np}$ ,  $x_i \in \mathcal{R}^p$ ,  $f_i : \mathcal{R}^p \rightarrow \mathcal{R}$  is a convex function,  $X$  is the global constraint.

First, we provide an assumption about the communication topology between agents over the network.

Consider a time-varying multi-agent network. The communication topology between agents over the network is described by a directed graph  $\mathcal{G}(k) = (\mathcal{N}, \mathcal{E}(k), W(k))$ , where  $\mathcal{N} = \{1, 2, \dots, n\}$  is the agent set,  $\mathcal{E}(k) \subset \mathcal{N} \times \mathcal{N}$  represents information communication links at time  $k$ , and  $W(k) = [w_{ij}(k)]_{i,j}$  represents the adjacency matrix at time  $k$ . In addition, denote  $\mathcal{N}_i(k) = \{j | (i, j) \in \mathcal{E}(k)\}$  as the neighbors of agent  $i$  at time  $k$ . Each agent interacts with its neighbors in  $\mathcal{G}(k) = (\mathcal{N}, \mathcal{E}(k), W(k))$  at time  $k$ . The following assumption is on the communication topology  $\mathcal{G}(k) = (\mathcal{N}, \mathcal{E}(k), W(k))$ , which is widely used in distributed time-varying network designs ([8], [9]).

**Assumption 1.** The graph  $\mathcal{G}(k) = (\mathcal{N}, \mathcal{E}(k), W(k))$  satisfies:

- (a) There exists a constant  $\eta$  with  $0 < \eta < 1$  such that,  $\forall k \geq 0$  and  $\forall i, j$ ,  $w_{ii}(k) \geq \eta$ ;  $w_{ij}(k) \geq \eta$  if  $(j, i) \in \mathcal{E}(k)$ .
- (b)  $W(k)$  is doubly stochastic, i. e.  $\sum_{i=1}^n w_{ij}(k) = 1$  and  $\sum_{j=1}^n w_{ij}(k) = 1$ .
- (c) There is an integer  $\kappa \geq 1$  such that  $\forall k \geq 0$  and  $\forall (j, i) \in \mathcal{N} \times \mathcal{N}$ ,  $(j, i) \in \mathcal{E}(k) \cup \mathcal{E}(k+1) \cup \dots \cup \mathcal{E}(k+\kappa-1)$ .

The following assumption holds for local functions and constraints of Problem (A1):

**Assumption 2.** (a) Problem (A1) has solutions.

- (b)  $f_{L_i}(x)$  and  $f_{R_i}(x)$  are convex functions with  $f_{L_i}(x) \leq f_{R_i}(x)$ .
- (c)  $X$  is a non-empty, compact, convex constraint set in  $\mathcal{R}^p$ .
- (d) The gradients of  $f_{L_i}(x)$  and  $f_{R_i}(x)$  are locally Lipschitz continuous with constant  $L$ .

Then, we assume the following assumption holds for parameter  $\lambda_i$  of Problem (A1):

**Assumption 3.** There exists a common  $\lambda_0 \in (0, 1)$ , such that for all agents  $i \in \mathcal{N}$ ,

$$g_i(x) = \lambda_0 f_{L_i}(x) + (1 - \lambda_0) f_{R_i}(x).$$

Assumption 3 gives the characteristics of stripe observations  $Y_{L_i}(x)$  and  $Y_{R_i}(x)$ , which results from inherent errors of measuring devices or methods over the network.  $(\hat{x}^*, \lambda_0)$  is the optimal solution to Problem (??), and  $(\hat{x}^*, \lambda_0)$  is expected exact solution to Problem (A1) with stripe observations  $Y_L(x)$  and  $Y_R(x)$  under Assumption 3.

Next, we give different probabilistic choices of each agents' initial preferences  $\lambda_i(0)$  for Algorithm 1.

**Assumption 4.** (a) Each agent  $i$  has an initial preference  $\lambda_i(0)$  with  $\lambda_0 = \sum_{i=1}^n \lambda_i(0)$ .

(b) Each agent  $i$  has an initial preference  $\lambda_i(0)$ .  $\lambda_i(0)$ s are independent and identically distributed (i.i.d.) random variables with  $\mathbb{E}\lambda_i(0) = \lambda_0$ .

(c) Each agent  $i$  has an initial preference  $\lambda_i(0)$ .  $\lambda_i(0)$ s are independent and identically distributed (i.i.d.) random variables with  $\mathbb{E}\lambda_i(0) = \lambda_0$ ,  $\text{var}\lambda_i(0) = \nu^2$ .

Assumption 4(a) is an ideal assumption that although each agent gets incomplete information of  $\lambda_i(0)$ , they could get the complete information of  $\lambda_0$  through cooperation. Assumption 4(b) and (c) are general probabilistic assumptions of agents preferences.

Still, the following assumption holds for parameters  $\{\Delta_i^q(k)\}_{k \geq 0}$  of Algorithm 1:

**Condition 1.** (Parameter selection)

\* Corresponding author (email: xianlin.zeng@bit.edu.cn)

(a) Let  $\{\Delta_i^q(k)\}_{k \geq 0}$  be a sequence of independent and identically distributed (i. i. d.) random variables, for any fixed  $(i, q)$ , all  $k \geq 0$  and  $(i, q)$ ,

$$|\Delta_i^q(k)| < M_1, \quad \left| \frac{1}{\Delta_i^q(k)} \right| < M_2, \quad \mathbb{E} \left[ \frac{1}{\Delta_i^q(k)} \right] = 0;$$

(b)  $\{\Delta_i^q(k)\}_{k \geq 0}$  and  $\{\Delta_j^r(k)\}_{k \geq 0}$  are mutually independent of each other for  $i \neq j$  or  $q \neq r$ .

**Remark 1.** In order to ensure the almost sure convergence of Algorithm 1,  $\{c(k)\}$  and  $\{\iota(k)\}$  should satisfy the stochastic approximation assumption [29]

$$\sum_{k=1}^{\infty} \frac{\iota(k)}{c(k)} = \infty, \quad \sum_{k=1}^{\infty} \frac{\iota^2(k)}{c^2(k)} < \infty,$$

and

$$\sum_{k=1}^{\infty} \iota(k)c(k) < \infty.$$

Therefore,  $0 \leq \epsilon < \frac{1}{4}$ ,  $\frac{1}{2} - \epsilon > \delta > \epsilon$ .

With the stripe observation environment of the distributed problem,  $\frac{\iota(k)}{c(k)}$  chosen in this paper differs from that of [17].

## Appendix B Proof of Theorem 3

The following lemma, is essential for the proof of Theorem 3.

**Lemma 1.** With Assumption 3,  $\|g(\mathbf{x}^*, \boldsymbol{\lambda}(\mathbf{0})) - g(\hat{\mathbf{x}}^*, \boldsymbol{\lambda}_0)\| \leq |\lambda(0) - \lambda_0| \cdot \|f_L(\hat{\mathbf{x}}^*) - f_R(\hat{\mathbf{x}}^*)\|$ .

*Proof.* We get

$$\begin{aligned} & \|g(\mathbf{x}^*, \boldsymbol{\lambda}(\mathbf{0})) - g(\hat{\mathbf{x}}^*, \boldsymbol{\lambda}_0)\| \\ &= \sum_{i=1}^n \left[ \lambda(0) f_{L_i}(x^*) + (1 - \lambda(0)) f_{R_i}(x^*) \right] - \sum_{i=1}^n \left[ \lambda_0 f_{L_i}(\hat{x}^*) + (1 - \lambda_0) f_{R_i}(\hat{x}^*) \right] \leq \|\Gamma_{1n} + \Gamma_{2n}\| \end{aligned} \quad (\text{B1})$$

where

$$\begin{aligned} \Gamma_{1n} &= \sum_{i=1}^n \left[ \lambda(0) (f_{L_i}(x^*) - f_{L_i}(\hat{x}^*)) + (1 - \lambda(0)) (f_{R_i}(x^*) - f_{R_i}(\hat{x}^*)) \right] \\ \Gamma_{2n} &= \sum_{i=1}^n \left[ (\lambda(0) - \lambda_0) (f_{L_i}(\hat{x}^*) - f_{R_i}(\hat{x}^*)) \right]. \end{aligned}$$

According to Assumption 2(b), we obtain

$$\begin{aligned} f_{L_i}(x^*) - f_{L_i}(\hat{x}^*) &\leq \langle \nabla f_{L_i}(x^*), x^* - \hat{x}^* \rangle \\ f_{R_i}(x^*) - f_{R_i}(\hat{x}^*) &\leq \langle \nabla f_{R_i}(x^*), x^* - \hat{x}^* \rangle. \end{aligned} \quad (\text{B2})$$

It yields

$$\begin{aligned} \|\Gamma_{1n}\| &= \left\| \sum_{i=1}^n \left[ \lambda(0) (f_{L_i}(x^*) - f_{L_i}(\hat{x}^*)) + (1 - \lambda(0)) (f_{R_i}(x^*) - f_{R_i}(\hat{x}^*)) \right] \right\| \\ &\leq \left\| \sum_{i=1}^n \left[ \lambda(0) f_{L_i}(x^*) + (1 - \lambda(0)) f_{R_i}(x^*) \right] \right\| \cdot \|f_{L_i}(\hat{x}^*) - f_{R_i}(\hat{x}^*)\|. \end{aligned} \quad (\text{B3})$$

Since  $(x^*, \lambda(0))$  is an optimal solution of the distributed problem, we have

$$\sum_{i=1}^n \left[ \lambda(0) f_{L_i}(x^*) + (1 - \lambda(0)) f_{R_i}(x^*) \right] = 0. \quad (\text{B4})$$

Therefore,

$$\|\Gamma_{1n}\| = 0. \quad (\text{B5})$$

Combining (B5) with (B1), yields

$$\|g(\mathbf{x}^*, \boldsymbol{\lambda}(\mathbf{0})) - g(\hat{\mathbf{x}}^*, \boldsymbol{\lambda}_0)\| \leq |\lambda(0) - \lambda_0| \cdot \|f_L(\hat{\mathbf{x}}^*) - f_R(\hat{\mathbf{x}}^*)\|. \quad (\text{B6})$$

Lemma 1 gives an upper bound of  $\|g(\mathbf{x}^*, \boldsymbol{\lambda}(\mathbf{0})) - g(\hat{\mathbf{x}}^*, \boldsymbol{\lambda}_0)\|$ .

Next, we provide the proof of Theorem 3.

*Proof.*

- (a) Theorem 3 is a direct conclusion of Lemma 1 and the fact that  $\lambda_0 = \lambda(0)$  with Assumption 4(a).  
 (b) According to the law of large numbers [23],

$$\lim_{n \rightarrow \infty} P(\|\lambda(0) - \lambda_0\| < \epsilon) = 1.$$

It yields

$$\lim_{n \rightarrow \infty} P\left(\|g(\mathbf{x}^*, \boldsymbol{\lambda}(0)) - g(\hat{\mathbf{x}}^*, \boldsymbol{\lambda}_0)\| < \epsilon c_0(\hat{\mathbf{x}}^*)\right) = 1.$$

- (c) The following equality holds according to the central limit theorem [23]:

$$\lim_{n \rightarrow \infty} P\left(\frac{\sqrt{n}(\lambda(0) - \lambda_0)}{\nu} \leq x\right) = \phi(x)$$

where  $\phi(x)$  is the cumulative distribution function of Gaussian distribution  $\mathcal{N}(0, 1)$ . With Lemma 1, we get

$$\begin{aligned} & \lim_{n \rightarrow \infty} P\left(\|g(\mathbf{x}^*, \boldsymbol{\lambda}(0)) - g(\hat{\mathbf{x}}^*, \boldsymbol{\lambda}_0)\| \leq a c_0(\hat{\mathbf{x}}^*)\right) \geq \lim_{n \rightarrow \infty} P\left(|\lambda(0) - \lambda_0| \leq a\right) \\ & = P\left(\frac{\sqrt{n}|\lambda(0) - \lambda_0|}{\nu} \leq \frac{\sqrt{na}}{\nu}\right) = \phi\left(\frac{\sqrt{na}}{\nu}\right) - \phi\left(-\frac{\sqrt{na}}{\nu}\right) = 2\phi\left(\frac{\sqrt{na}}{\nu}\right) - 1 \end{aligned}$$

and

$$\begin{aligned} & \lim_{n \rightarrow \infty} P\left(\|g(\mathbf{x}^*, \boldsymbol{\lambda}(0)) - g(\hat{\mathbf{x}}^*, \boldsymbol{\lambda}_0)\| \geq b c_0(\hat{\mathbf{x}}^*)\right) \leq \lim_{n \rightarrow \infty} P\left(|\lambda(0) - \lambda_0| \geq b\right) \\ & = P\left(\frac{\sqrt{n}|\lambda(0) - \lambda_0|}{\nu} \geq \frac{\sqrt{nb}}{\nu}\right) = 1 - \phi\left(\frac{\sqrt{nb}}{\nu}\right) + \phi\left(-\frac{\sqrt{nb}}{\nu}\right) = 2 - 2\phi\left(\frac{\sqrt{nb}}{\nu}\right). \end{aligned}$$

## References

- 1 Anit K S, Dusan J, Dragana B, et al. Distributed zeroth order optimization over random networks: A Kiefer-Wolfowitz stochastic approximation approach[J]. arXiv preprint arXiv:1803.07836, 2018.
- 2 Nedić Liu Q, Le X, Li K. A distributed optimization algorithm based on multiagent network for economic dispatch with region partitioning[J]. IEEE transactions on cybernetics, 2019, 51(5): 2466-2475.
- 3 Yi P, Hong Y, Liu F. Initialization-free distributed algorithms for optimal resource allocation with feasibility constraints and application to economic dispatch of power systems[J]. Automatica, 2016, 74: 259-269.
- 4 Li Z, Liu X, Ren W, et al. Distributed tracking control for linear multiagent systems with a leader of bounded unknown input[J]. IEEE Transactions on Automatic Control, 2012, 58(2): 518-523.
- 5 Lei J, Chen H F, Fang H T. Asymptotic properties of primal-dual algorithm for distributed stochastic optimization over random networks with imperfect communications[J]. SIAM Journal on Control and Optimization, 2018, 56(3): 2159-2188.
- 6 Wang Y, Lin P, Hong Y. Distributed regression estimation with incomplete data in multi-agent networks[J]. Science China Information Sciences, 2018, 61(9): 1-14.
- 7 Liu S, Qiu Z, Xie L. Convergence rate analysis of distributed optimization with projected subgradient algorithm[J]. Automatica, 2017, 83: 162-169.
- 8 Nedic A, Ozdaglar A. Distributed subgradient methods for multi-agent optimization[J]. IEEE Transactions on Automatic Control, 2009, 54(1): 48-61.
- 9 Sundhar Ram S, Nedi04 A, Veeravalli V V. Distributed stochastic subgradient projection algorithms for convex optimization[J]. Journal of optimization theory and applications, 2010, 147(3): 516-545.
- 10 Yang T, Yi X, Wu J, et al. A survey of distributed optimization[J]. Annual Reviews in Control, 2019, 47: 278-305.
- 11 Liang S, Yin G. Exponential convergence of distributed primal-dual convex optimization algorithm without strong convexity[J]. Automatica, 2019, 105: 298-306.
- 12 Liang S, Yin G. Dual averaging push for distributed convex optimization over time-varying directed graph[J]. IEEE Transactions on Automatic Control, 2019, 65(4): 1785-1791.
- 13 Tsianos K I, Lawlor S, Rabbat M G. Push-sum distributed dual averaging for convex optimization[C]//2012 IEEE 51st IEEE conference on decision and control (cdc). IEEE, 2012: 5453-5458.
- 14 Yuan D, Ho D W C, Xu S. Zeroth-order method for distributed optimization with approximate projections[J]. IEEE transactions on neural networks and learning systems, 2015, 27(2): 284-294.
- 15 Yuan D, Ho D W C. Randomized gradient-free method for multiagent optimization over time-varying networks[J]. IEEE Transactions on Neural Networks and Learning Systems, 2014, 26(6): 1342-1347.
- 16 Marinopoulos A G, Alexiadis M C, Dokopoulos P S. Energy losses in a distribution line with distributed generation based on stochastic power flow[J]. Electric Power Systems Research, 2011, 81(10): 1986-1994.
- 17 Wang Y, Zhao W, Hong Y, et al. Distributed subgradient-free stochastic optimization algorithm for nonsmooth convex functions over time-varying networks[J]. SIAM Journal on Control and Optimization, 2019, 57(4): 2821-2842.
- 18 Wang Y, Tu Z, Qin H. Distributed stochastic mirror descent algorithm for resource allocation problem[J]. Control Theory and Technology, 2020, 18(4): 339-347.
- 19 Chang Y, Yan L, Wu T, et al. Remote sensing image stripe noise removal: From image decomposition perspective[J]. IEEE Transactions on Geoscience and Remote Sensing, 2016, 54(12): 7018-7031.
- 20 Chen Y, Huang T Z, Zhao X L, et al. Stripe noise removal of remote sensing images by total variation regularization and group sparsity constraint[J]. Remote sensing, 2017, 9(6): 559.
- 21 Chen C, Wang F, Zhou B, et al. An interval optimization based day-ahead scheduling scheme for renewable energy management in smart distribution systems[J]. Energy Conversion and Management, 2015, 106: 584-596.
- 22 Li Y Z, Wu Q H, Jiang L, et al. Optimal power system dispatch with wind power integrated using nonlinear interval optimization and evidential reasoning approach[J]. IEEE Transactions on Power Systems, 2015, 31(3): 2246-2254.

- 23 Durrett R. Probability: theory and examples[M]. Cambridge university press, 2019.
- 24 Bhurjee A K, Panda G. Efficient solution of interval optimization problem[J]. *Mathematical Methods of Operations Research*, 2012, 76(3): 273-288.
- 25 Nedi04 A, Olshevsky A. Stochastic gradient-push for strongly convex functions on time-varying directed graphs[J]. *IEEE Transactions on Automatic Control*, 2016, 61(12): 3936-3947.
- 26 Polyak B T. Introduction to optimization. optimization software[J]. Inc., Publications Division, New York, 1987, 1-32.
- 27 Maeda T. On characterization of fuzzy vectors and its applications to fuzzy mathematical programming problems[J]. *Fuzzy Sets and Systems*, 2008, 159(24): 3333-3346.
- 28 DeGroot M H. Reaching a consensus[J]. *Journal of the American Statistical Association*, 1974, 69(345): 118-121.
- 29 Robbins H, Monro S. A stochastic approximation method[J]. *The annals of mathematical statistics*, 1951: 400-407.
- 30 Clarke F H, Ledyaev Y S, Stern R J, et al. *Nonsmooth analysis and control theory*[M]. Springer Science & Business Media, 2008.
- 31 Carmona R, Lacker D. A probabilistic weak formulation of mean field games and applications[J]. *The Annals of Applied Probability*, 2015, 25(3): 1189-1231.
